# Supplementary figures and images for: Gene–microRNA Network Analysis Identified Seven Hub Genes in Association with Progression and Prognosis in Non-Small Cell Lung Cancer
Source: MDPI journal article supplement (doi:10.3390/genes13081480), 2022-08-19

Transcripts Per Million (TPM)

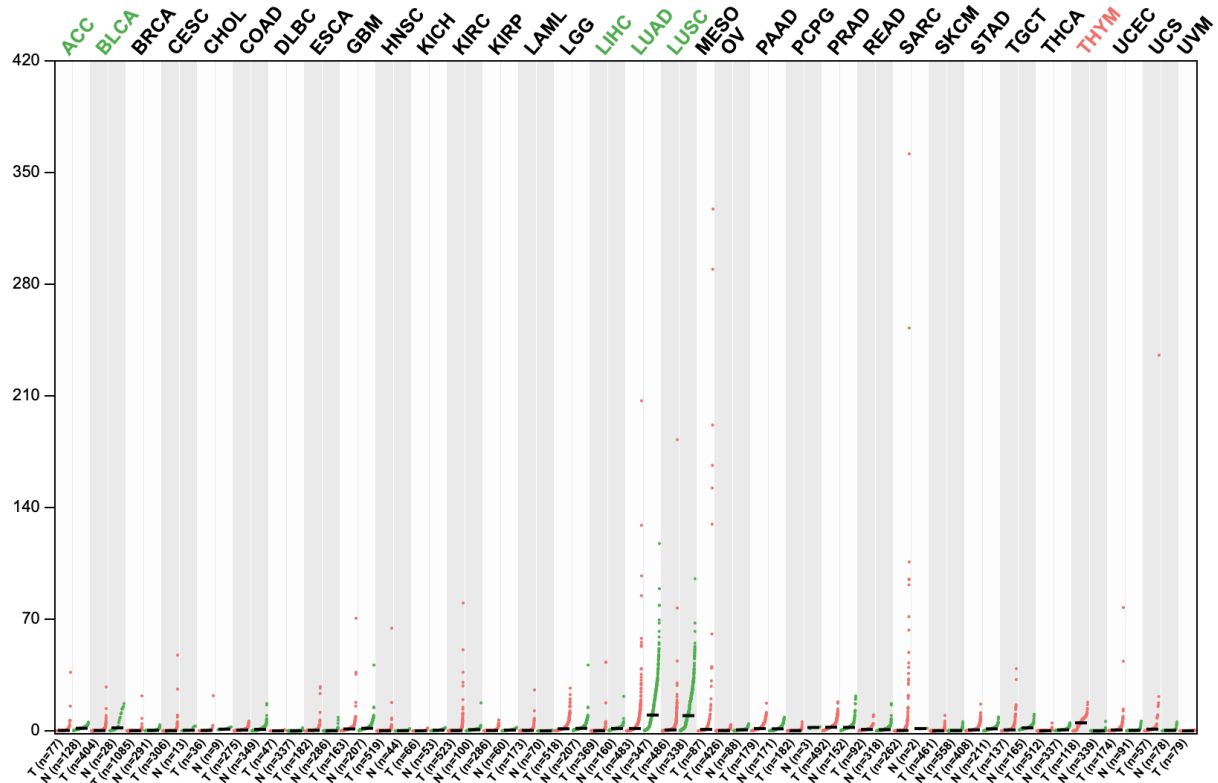

Transcripts Per Million (TPM)

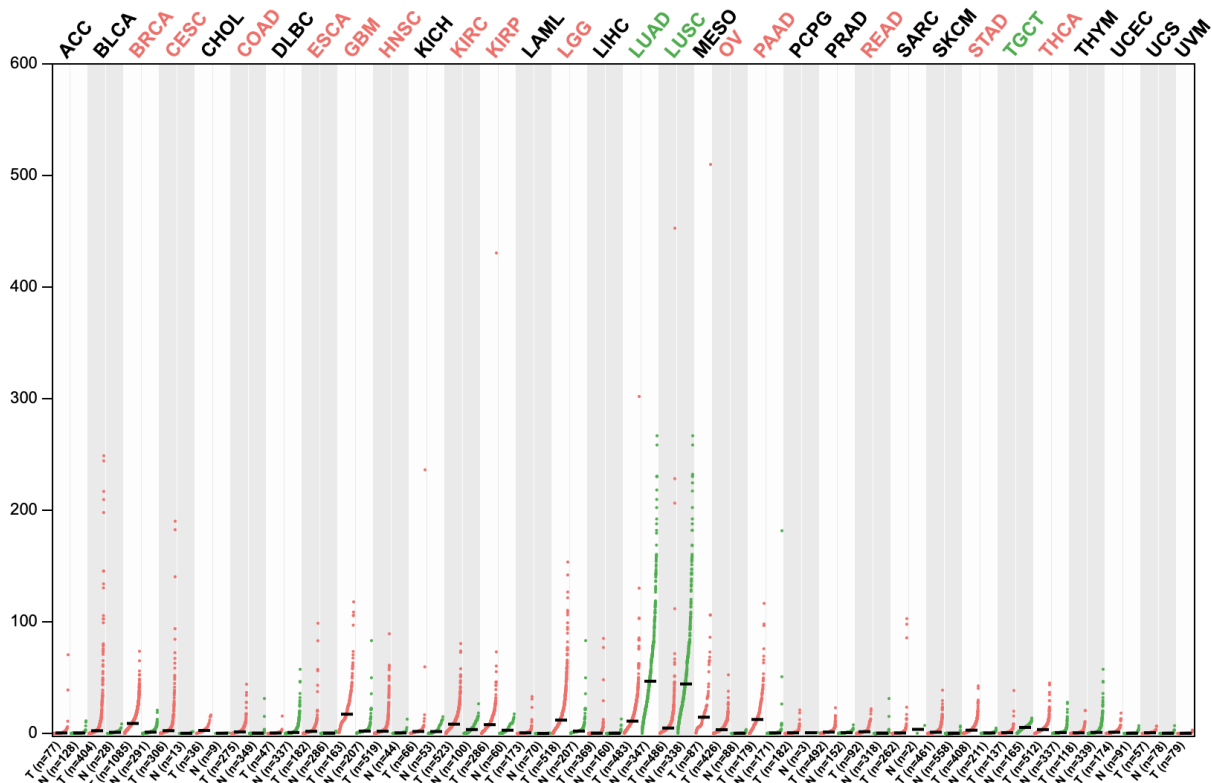

Supplement: s1 [file s1]

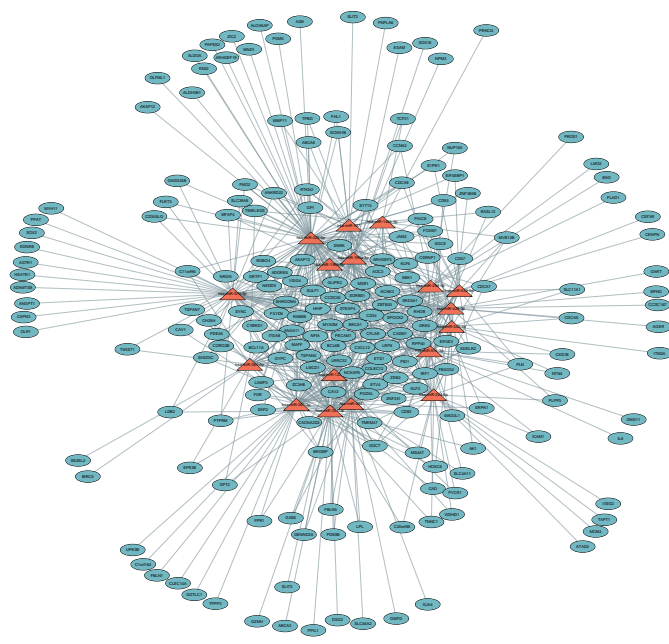

Supplement: s1 [file s1]
